# Supplementary material for: Inhibition of Metastatic Potential in Breast CarcinomaIn VivoandIn Vitrothrough Targeting VEGFRs and FGFRs
Source: Hindawi journal article supplement (doi:10.1155/2013/718380), 2013-01-01
Supplement: f1 [file 718380.f1.pdf]

**Supplemental Figure 1**

0100194-A

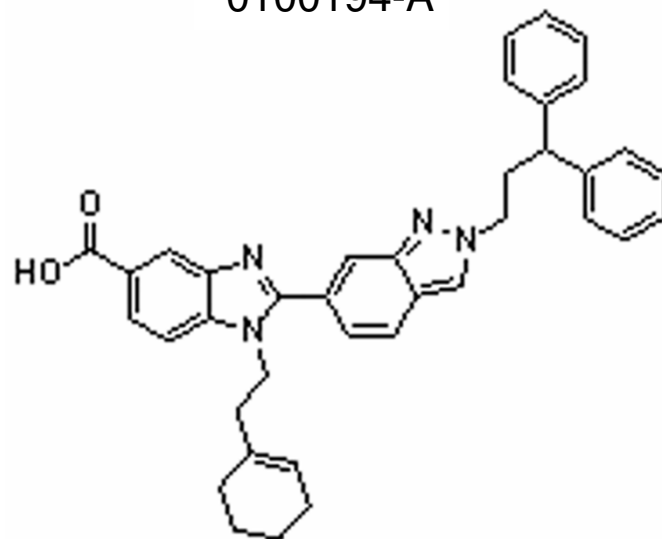

**Supplemental Figure 1.** Chemical structure of 0100194-A

## Supplemental Figure 2

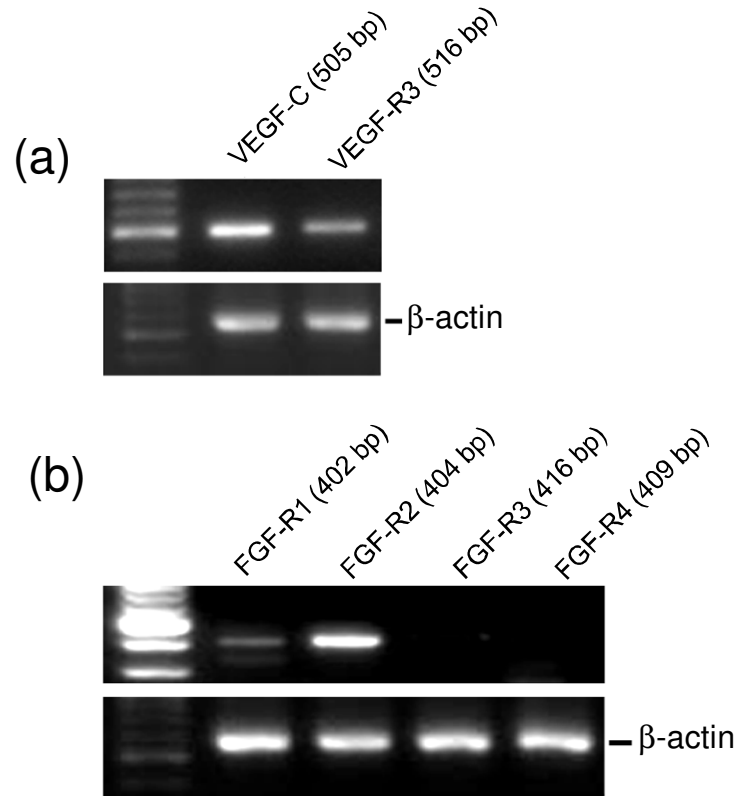

**Supplemental Figure 2.** mRNAs were isolated from 4T1-Luc<sup>+</sup> cells and amplified by using the following primers: VEGF-C: sense 5'-CCA CAG TGT CAG GCA GCT AA-3' and antisense 5'-TCC TGG ATC ACA ATG CTT CA-3'; VEGF-R3: sense 5'-GCC CTA CTG CAA GGT GCT AC-3' and antisense 5'-GCT TCT CTC CAA CCA ACA GC-3'; FGF-R1: sense 5'- TCA CAG CCA CTC TCT GCA CT-3' and antisense 5'- GGT TTG GTT TGG TGT TGT CC; FGF-R2: sense 5'-GAA CCA GAA GGA GCA CCG TA-3' and antisense 5'-CGC TGT AAA CCT TGC AGA CA-3'; FGF-R3: sense 5'-CCA CCG ACA AGG AGC TAG AG-3' and antisense 5'- AAC ATT GGC CAG AAC AGG AC-3'; FGF-R4: sense 5'- TGT CTA CCC ACA GCA AGC AC-3' and antisense 5'-GTC GCT GTA CAC CTT GCA GA-3'. The cycling conditions were 10 min polymerase activation at 95 °C followed by 32 cycles at 95 °C for 15 s, 58 °C for 60 s, and 72 °C for 60 s.

## Supplemental Table 1

### Kinase selectivity profile of 0100194-A

| Kinases | 0100194<br>IC <sub>50</sub> ( μM) (n=2) | Kinases        | 0100194<br>IC <sub>50</sub> ( μM) (n=2) |
|---------|-----------------------------------------|----------------|-----------------------------------------|
| VEGF-R2 | 0.55                                    | FGF-R3         | >10                                     |
| VEGF-R3 | 0.48                                    | EGFR           | >10                                     |
| FGF-R1  | 1.33                                    | PDGFR $\alpha$ | >10                                     |
| FGF-R2  | 1.06                                    | PDGFR $\beta$  | >10                                     |
| FGF-R4  | 0.94                                    | FAK            | >10                                     |
| HER2    | 9.4                                     | ABL2           | >10                                     |
| SRC     | 7.58                                    | IGF1R          | >10                                     |

**Supplemental Table 1.** Kinase selectivity profile of 194-A. The kinase assays were performed by the MDS Pharma Services. Human VEGF-R2, VEGF-R3, PDGF-R $\alpha$ , PDGF-R $\beta$ , and FGF-R1~4 were expressed and purified from Sf21 cells. SRC, FAK, and HER2 were expressed and purified from Sf9 cells. EGFR was expressed and purified from A431 cells.  $\gamma$ -[P32] ATP or ATP was used as the phosphate donor and poly (Glu:Tyr) peptide was used as the acceptor.
